# Supplementary material for: Multicomponent oxide microspheres with designed macroporosity (MICROSCAFS®): a customized platform for chemicals immobilization
Source: Royal Society of Chemistry journal article supplement (doi:10.1039/d3ra00895a), 2023-01-01
Supplement: d3ra00895a1.pdf [file d3ra00895a1.pdf]

## Supplementary File

### Multicomponent oxide microspheres with designed macroporosity (MICROSCAFS®): a customized platform for chemicals immobilization

Mário Vale<sup>1</sup>, Sofia Orišková<sup>1</sup>, António Mariquito<sup>1</sup>, Luís Reis<sup>2</sup>, Moisés Pinto<sup>1</sup>, and Ana C. Marques<sup>1,\*</sup>

<sup>1</sup> CERENA, DEQ, Instituto Superior Técnico, Universidade de Lisboa, Av. Rovisco Pais, 1049-001, Lisboa, Portugal

<sup>2</sup> IDMEC, Instituto Superior Técnico, Universidade de Lisboa, Av. Rovisco Pais, 1049-001, Lisboa, Portugal

\*[ana.marques@tecnico.ulisboa.pt](mailto:ana.marques@tecnico.ulisboa.pt)

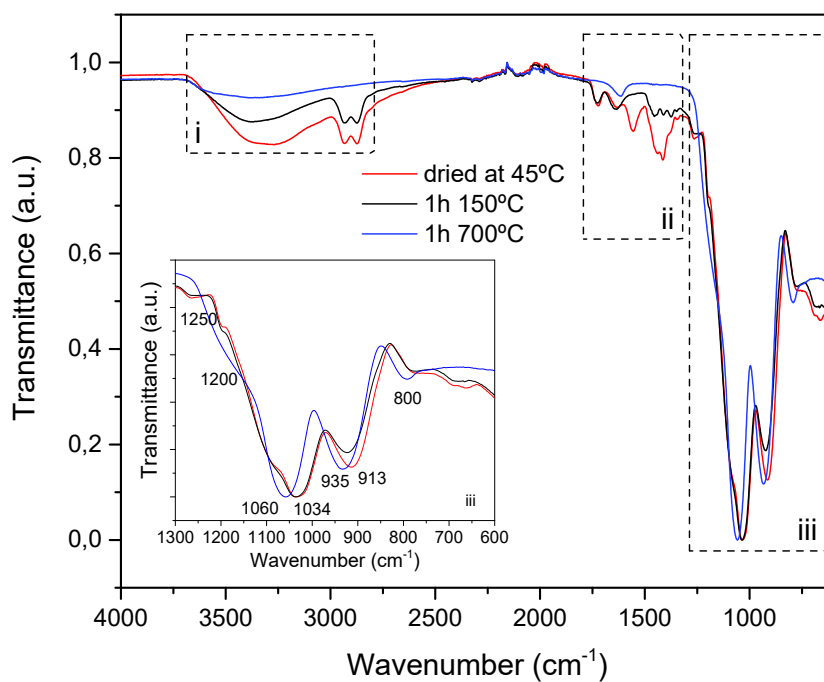

**Supplementary Figure S1.** ATR-FTIR spectra of MICROSCAFS® ST/50C, dried at 40°C, with heat treatment for 1h at 150°C and 700°C.

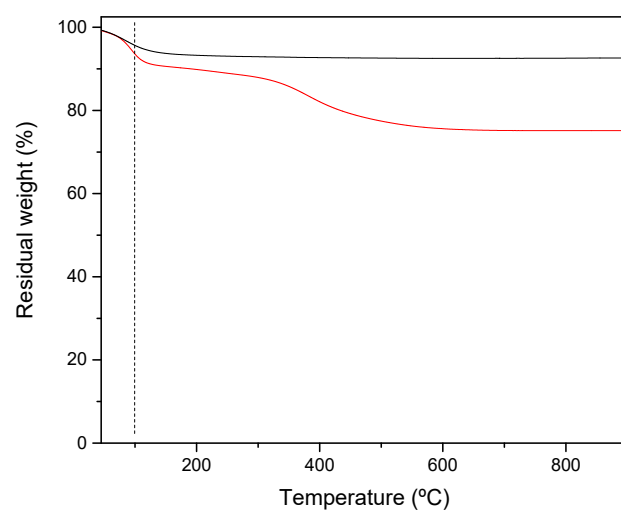

**Supplementary Figure S2.** Thermogram of MICROSCAFS® ST/50C dried at 45 °C (red) and heat treated for 1 hour at 700 °C (black).

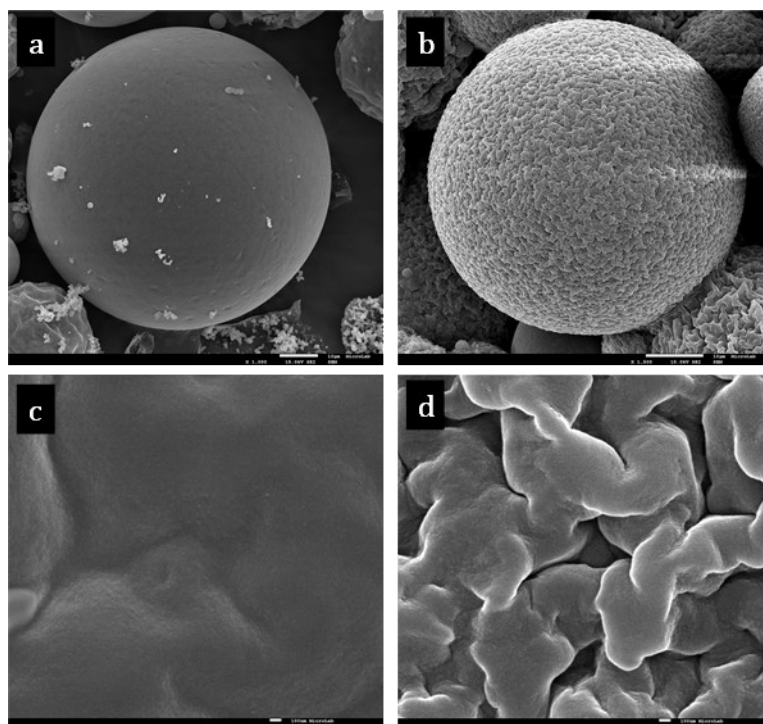

**Supplementary Figure S3.** SEM images of MICROSCAFS® ST/85C: without LiOH treatment (a) scale bar: 10  $\mu\text{m}$ , (c) scale bar: 100 nm; with LiOH treatment (b) scale bar: 10  $\mu\text{m}$ , (d) scale bar: 100 nm.

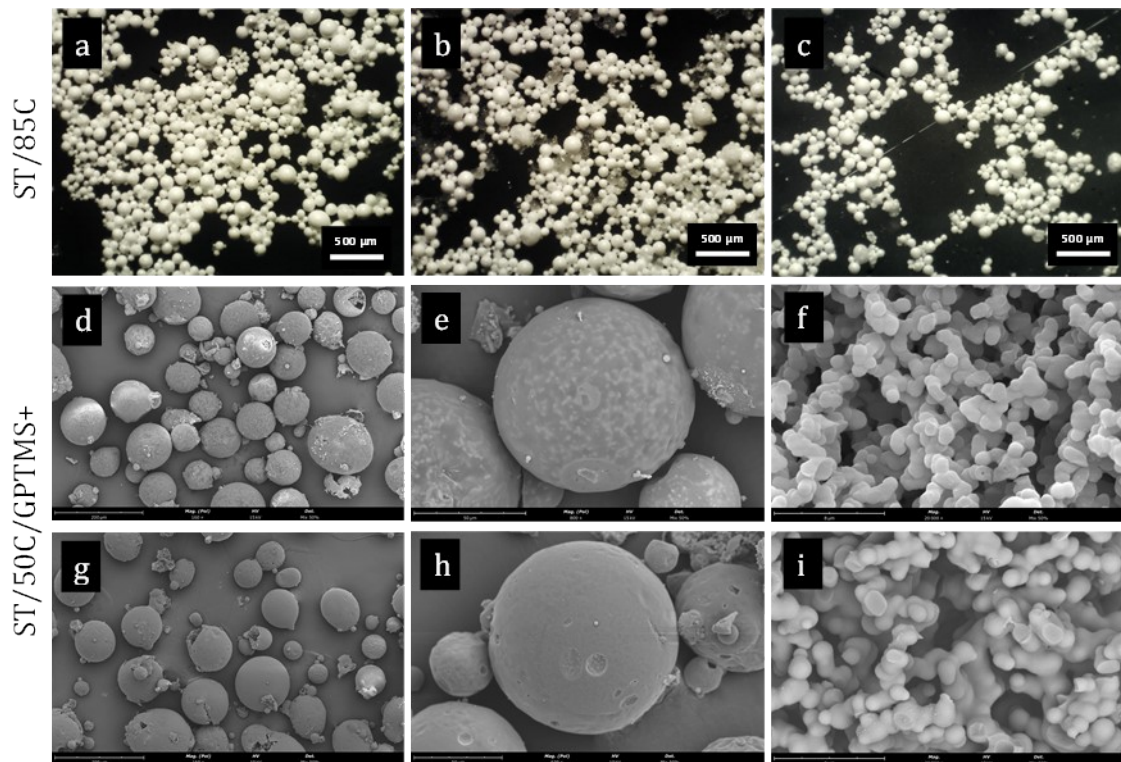

**Supplementary Figure S4.** Evidence for synthesis reproducibility: (a, b, c) Optical microscopy images of three different batches of the same synthesis of MICROSCAFS® ST/85C; (d, g) SEM images (scale bar: 200 µm) of two different batches of the synthesis of MICROSCAFS® ST/50C/GPTMS+; (e,h) same as (d, g) with scale bar = 50 µm; (f, i) same as (d, g) with scale bar = 5 µm. Note: d, e and f were acquired with a higher voltage (15 kV) than g, h and i (10 kV).

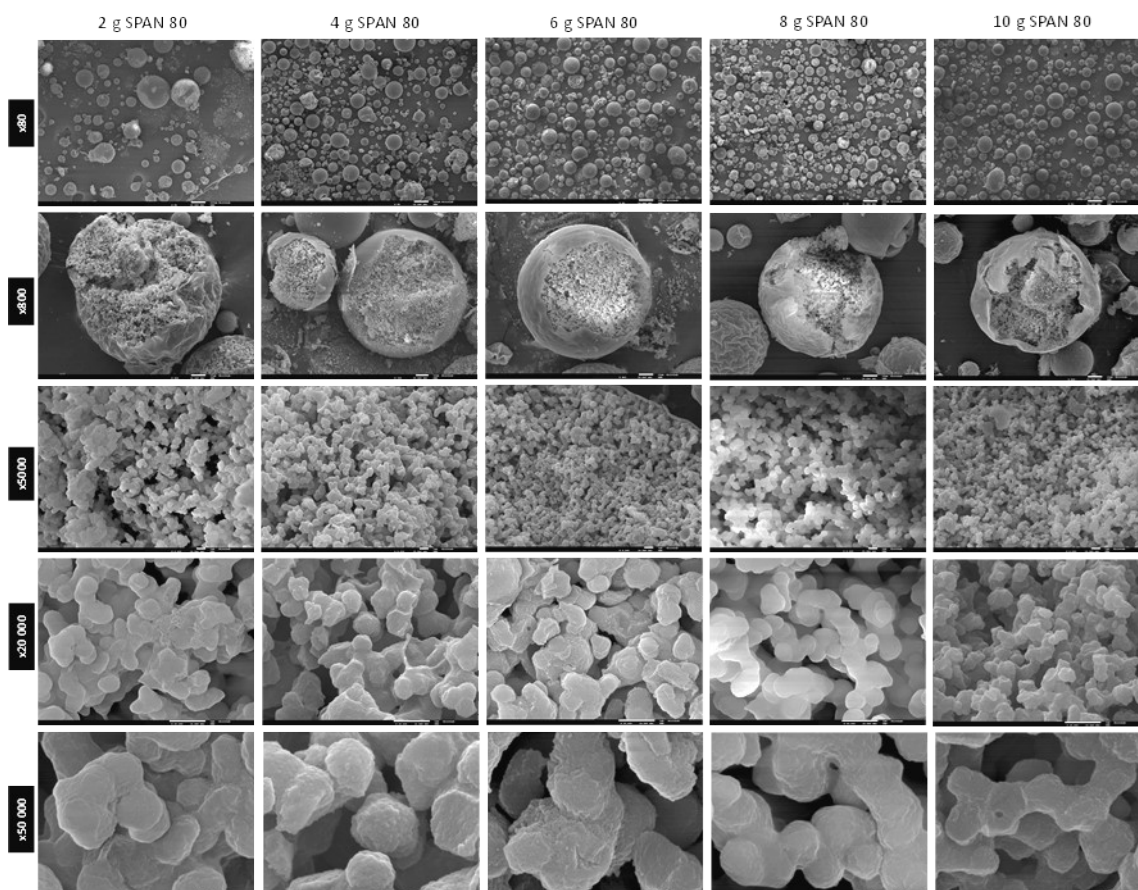

**Supplementary Figure S5.** SEM images of the MICROSCAFS® ST/85C, at different magnifications, obtained using different quantities of surfactant SPAN 80: 2, 4, 6, 8 and 10 g. Scale bar (from top to bottom): 100  $\mu\text{m}$ , 10  $\mu\text{m}$ , 1  $\mu\text{m}$ , 1  $\mu\text{m}$ , 100 nm.

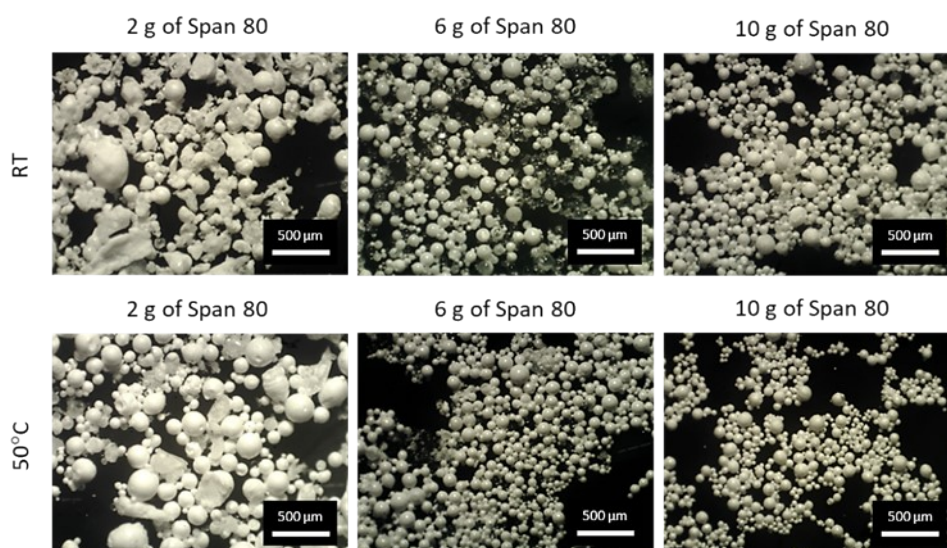

**Supplementary Figure S6.** Optical microscopy images of the MICROSCAFS® ST/RT and ST/50C obtained using different quantities of surfactant Span® 80: 2, 6 and 10 g.

**Supplementary Table S7.** Particle size distribution data.

| Sample acronym | D (0.1), $\mu\text{m}$ | D (0.5), $\mu\text{m}$ | D (0.9), $\mu\text{m}$ | Span |
|----------------|------------------------|------------------------|------------------------|------|
| ST/RT          | 40                     | 89                     | 169                    | 1.45 |
| ST/50C         | 44                     | 102                    | 220                    | 1.72 |
| ST/85C         | 47                     | 96                     | 172                    | 1.31 |
| ST/50C/GPTMS-  | 32                     | 75                     | 178                    | 1.94 |
| ST/50C/GPTMS+  | 66                     | 102                    | 190                    | 1.11 |
| ST/50C/AA+     | 64                     | 134                    | 242                    | 1.33 |
| ST/50C/W+      | 48                     | 112                    | 277                    | 2.04 |
| STH/50C/GPTMS+ | 44                     | 103                    | 253                    | 2.03 |

**Supplementary Table S8.** Average hydrolyzate viscosity and MICROSCAFS<sup>®</sup> synthesis pH.

| Sample acronym | Average hydrolyzate viscosity (cP) | Average synthesis pH |
|----------------|------------------------------------|----------------------|
| ST/RT          | 16.2 $\pm$ 0.8*                    | 9.23 $\pm$ 0.02      |
| ST/50C         | 16.2 $\pm$ 0.8                     | 8.51 $\pm$ 0.04      |
| ST/85C         | 16.2 $\pm$ 0.8*                    | 6.67 $\pm$ 0.08      |
| ST/50C/GPTMS-  | 25.0 $\pm$ 1.2                     | 9.22 $\pm$ 0.01      |
| ST/50C/GPTMS+  | 14.8 $\pm$ 0.4                     | 8.97 $\pm$ 0.01      |
| ST/50C/AA+     | 14.8 $\pm$ 0.6                     | 7.61 $\pm$ 0.01      |
| ST/50C/W+      | 16.2 $\pm$ 0.8*                    | 8.62 $\pm$ 0.02      |
| STH/50C/GPTMS+ | 45.3 $\pm$ 0.3                     | 9.05 $\pm$ 0.01      |

\*same hydrolyzate as for ST/50C

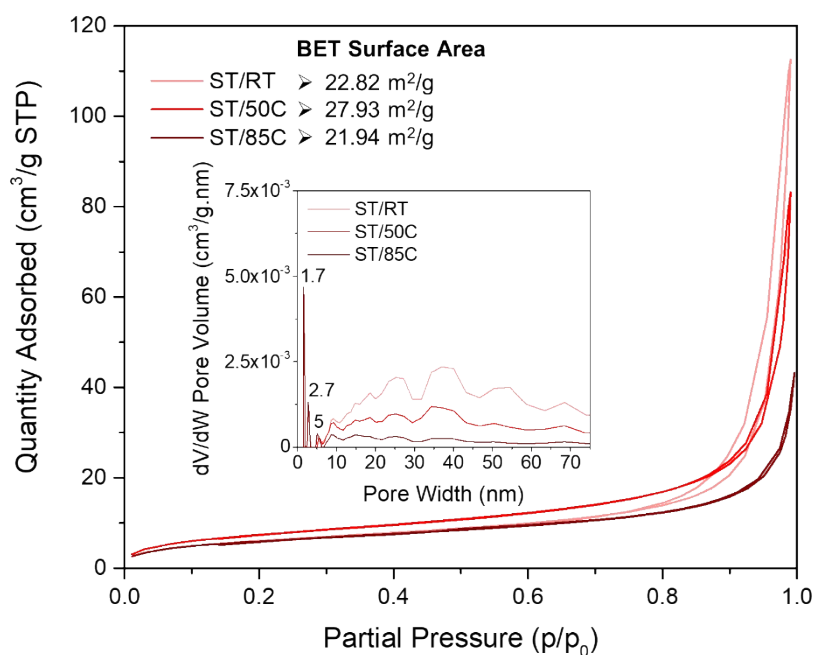

**Supplementary Figure S9.** BET adsorption isotherm and DFT pore size distribution (inset) of MICROSCAFS<sup>®</sup> synthesized at room temperature (ST/RT), 50 °C (ST/50C), and 85 °C (ST/85C).

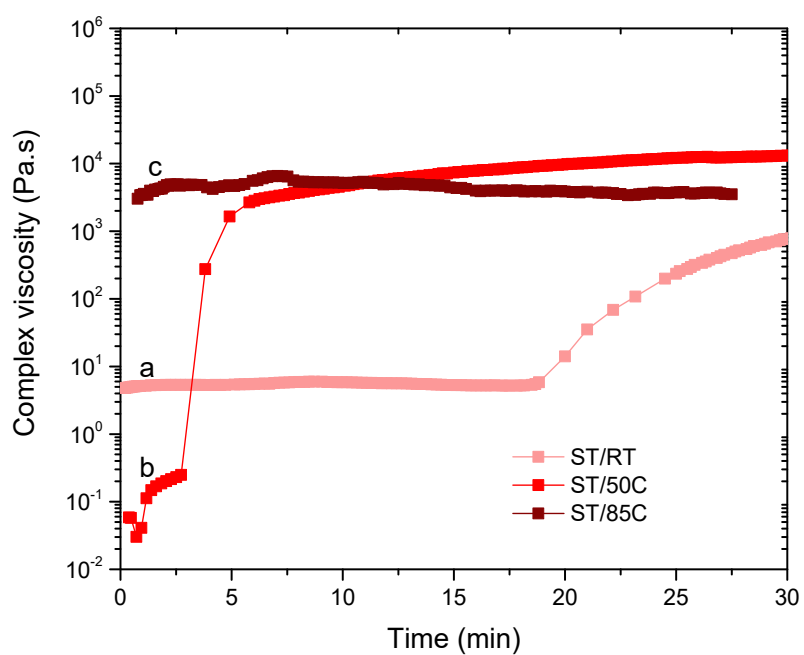

**Supplementary Figure S10.** Complex viscosity evolution over time for the hydrolyzates at (a) room temperature, (b) 50 °C, and (c) 85 °C.

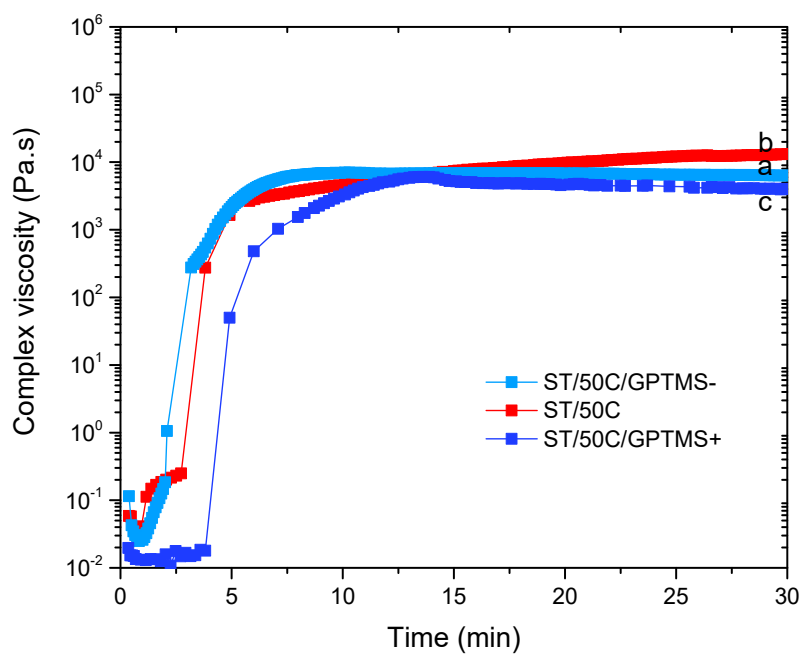

**Supplementary Figure S11.** Complex viscosity evolution over time of the hydrolyzates with (a) 0.65, (b) 0.86, and (c) 1.08 GPTMS/TEOS molar ratio.

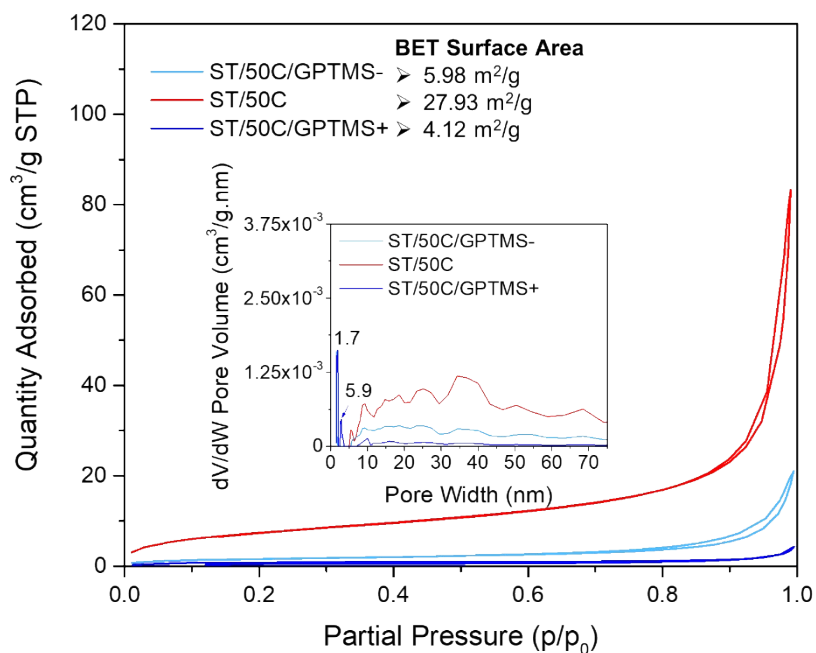

**Supplementary Figure S12.** BET adsorption isotherm and DFT pore size distribution (inset) of MICROSCAFS<sup>®</sup> synthesized using 0.65 (ST/50C/GPTMS-), 0.86 (ST/50C), and 1.08 (ST/50C/GPTMS+), GPTMS/TEOS molar ratio.

**Supplementary Table S13.** EDS relative atomic concentrations of the dried MICROSCAFS<sup>®</sup>.

| Sample acronym | Relative atomic concentration % |      |     |
|----------------|---------------------------------|------|-----|
|                | Si                              | Ti   | Hf  |
| ST/50C/GPTMS-  | 84.3                            | 15.7 | 0   |
| ST/50C         | 82.8                            | 17.3 | 0   |
| ST/50C/GPTMS+  | 79.7                            | 20.3 | 0   |
| STH/50C/GPTMS+ | 80.3                            | 12.1 | 7.6 |

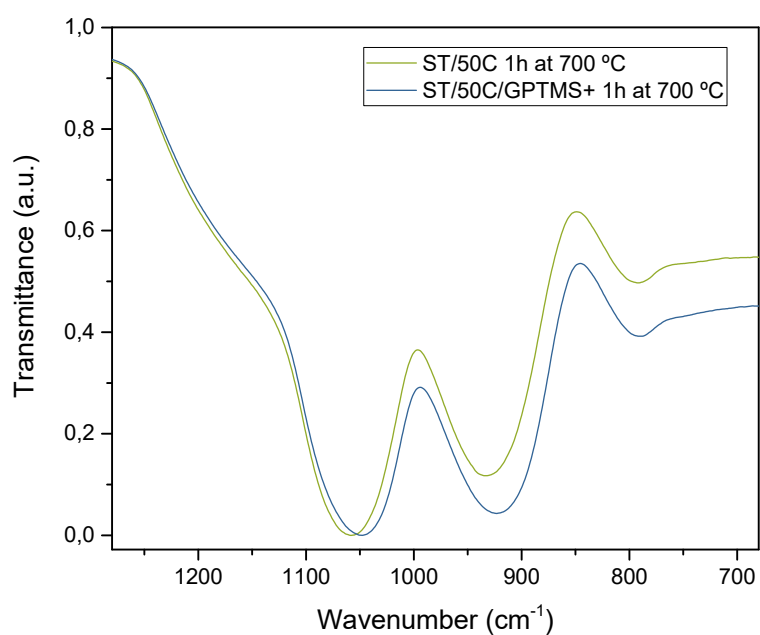

**Supplementary Figure S14.** ATR-FTIR spectra of MICROSCAFS® ST/50C and ST/50C/GPTMS+, with heat treatment for 1h at 700°C.

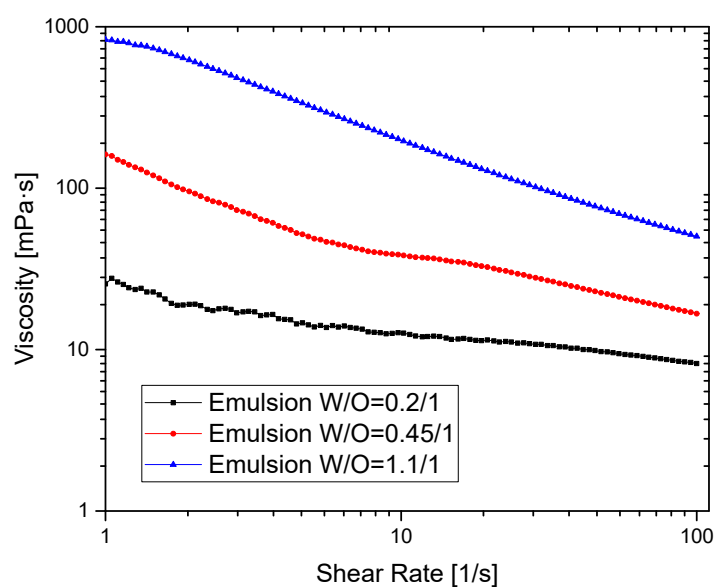

**Supplementary Figure S15.** Flow test curves of three groups of emulsion each belonging to different W/O ratios.



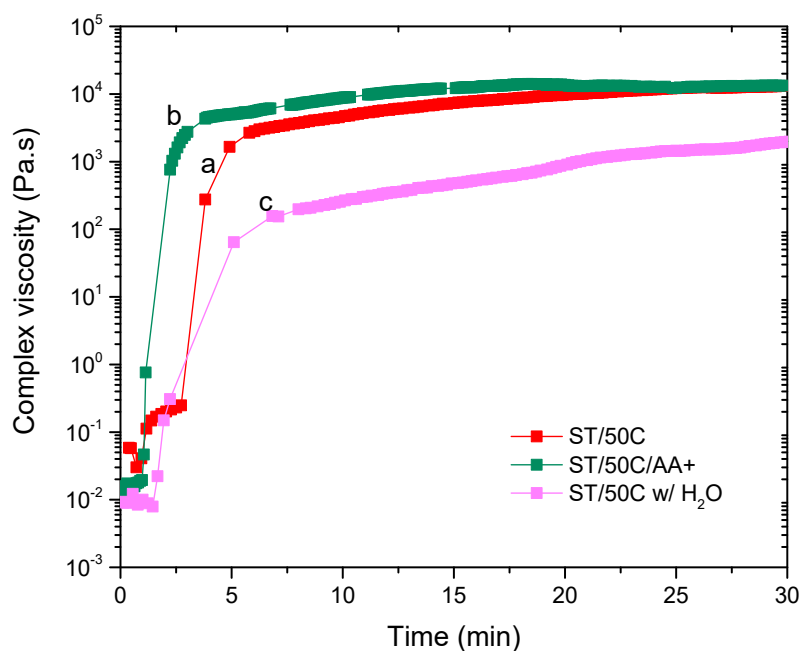

**Supplementary Figure S16.** Complex viscosity evolution over time of the hydrolyzates with (a) 1:4 TiPOT:CH<sub>3</sub>COOH molar ratio (sample ST/50C), (b) 1:6 TiPOT:CH<sub>3</sub>COOH molar ratio (sample ST/50C/AA+), and (c) 1:4 TiPOT:CH<sub>3</sub>COOH molar ratio, diluted with an equivalent amount of the excess of emulsion water.

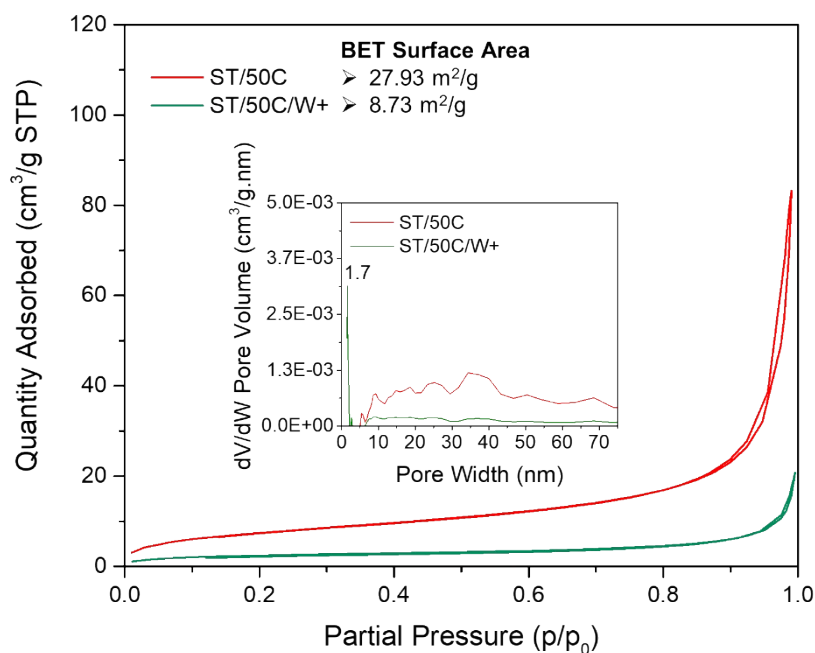

**Supplementary Figure S17.** BET adsorption isotherm and DFT pore size distribution (inset) of MICROSCAFS<sup>®</sup> synthesized at 0.45:1 (ST/50C) and 0.68:1 (ST/50C/W+) W/O mass ratios.

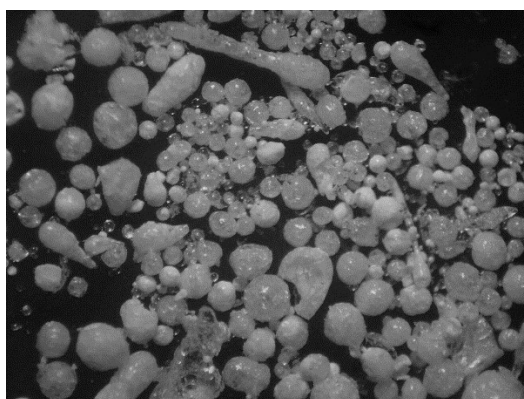

**Supplementary Figure S18.** Optical microscopy photograph of STH MICROSCAFS® made using 13.7 g of hafnium dichloride oxide octahydrate salt.

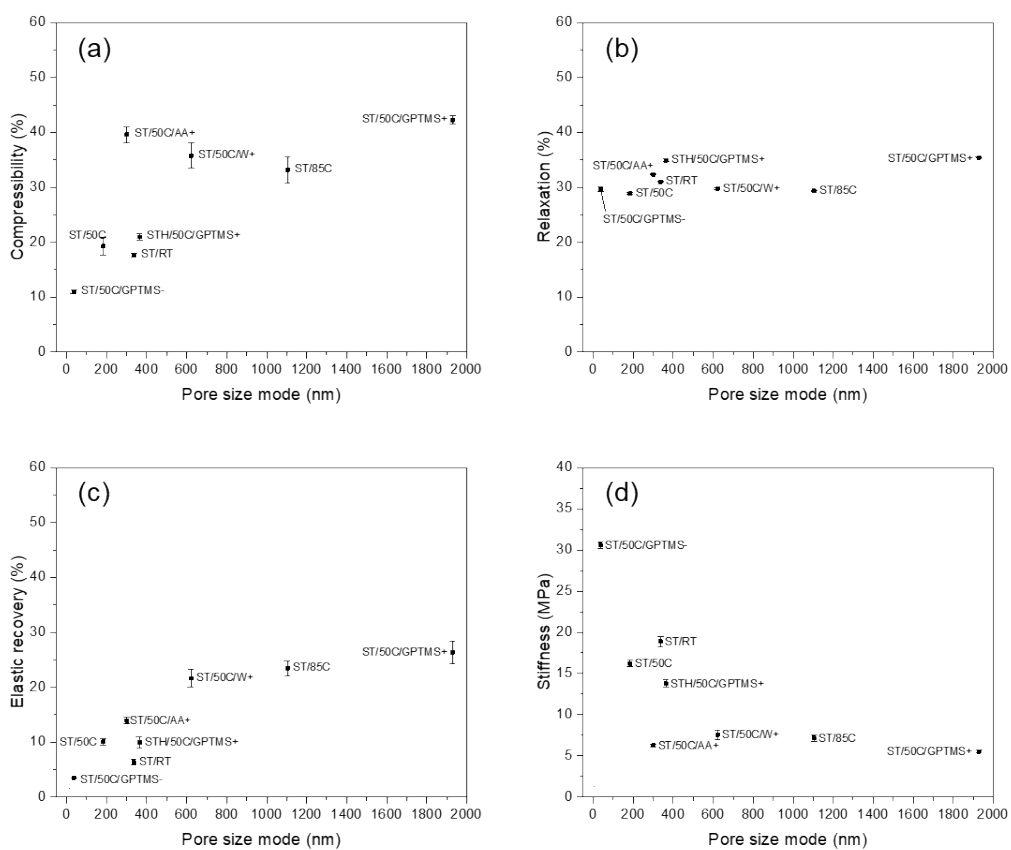

**Supplementary Figure S19.** Effect of MICROSCAFS® pore size mode in (a) compressibility, (b) relaxation, (c) elastic recovery, and (d) stiffness.

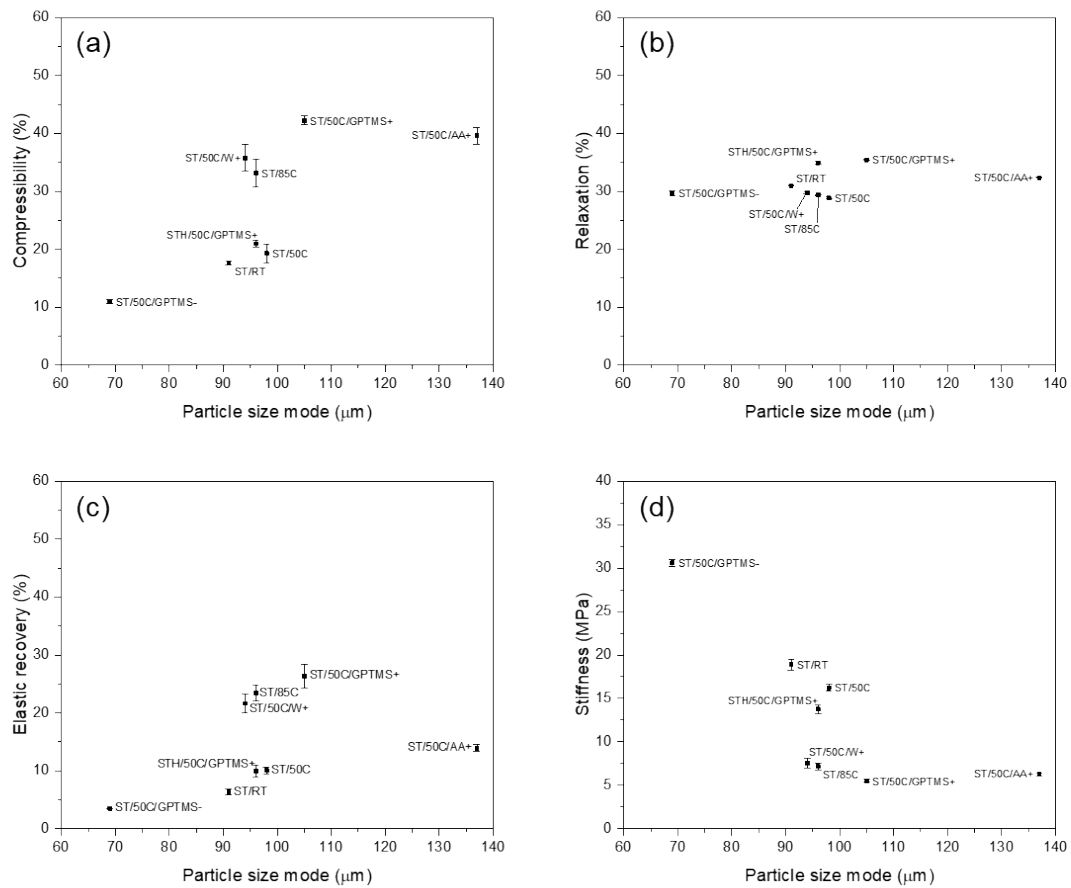

**Supplementary Figure S20.** Effect of MICROSCAFS® particle size mode in (a) compressibility, (b) relaxation, (c) elastic recovery, and (d) stiffness.

**Supplementary Table S21.** Mechanical parameters of the dried MICROSCAFS®.

| Sample acronym | Compressibility (%) | Relaxation (%) | Stiffness (MPa) | Elastic recovery (%) |
|----------------|---------------------|----------------|-----------------|----------------------|
| ST/RT          | 17.6 ± 0.4          | 30.9 ± 0.1     | 18.9 ± 0.6      | 6.3 ± 0.5            |
| ST/50C         | 19.3 ± 1.6          | 28.9 ± 0.2     | 16.2 ± 0.4      | 10.1 ± 0.6           |
| ST/85C         | 33.2 ± 2.4          | 29.4 ± 0.1     | 7.2 ± 0.4       | 23.5 ± 1.3           |
| ST/50C/GPTMS-  | 11.0 ± 0.4          | 29.6 ± 0.2     | 30.6 ± 0.4      | 3.5 ± 0.1            |
| ST/50C/GPTMS+  | 42.2 ± 0.8          | 35.4 ± 0.1     | 5.5 ± 0.2       | 26.4 ± 2.0           |
| ST/50C/AA+     | 39.6 ± 1.4          | 32.4 ± 0.1     | 6.3 ± 0.2       | 13.9 ± 0.6           |
| ST/50C/W+      | 35.7 ± 2.3          | 29.8 ± 0.2     | 7.6 ± 0.5       | 21.6 ± 1.6           |
| STH/50C/GPTMS+ | 20.9 ± 0.6          | 34.9 ± 0.3     | 13.8 ± 0.5      | 10.0 ± 1.0           |

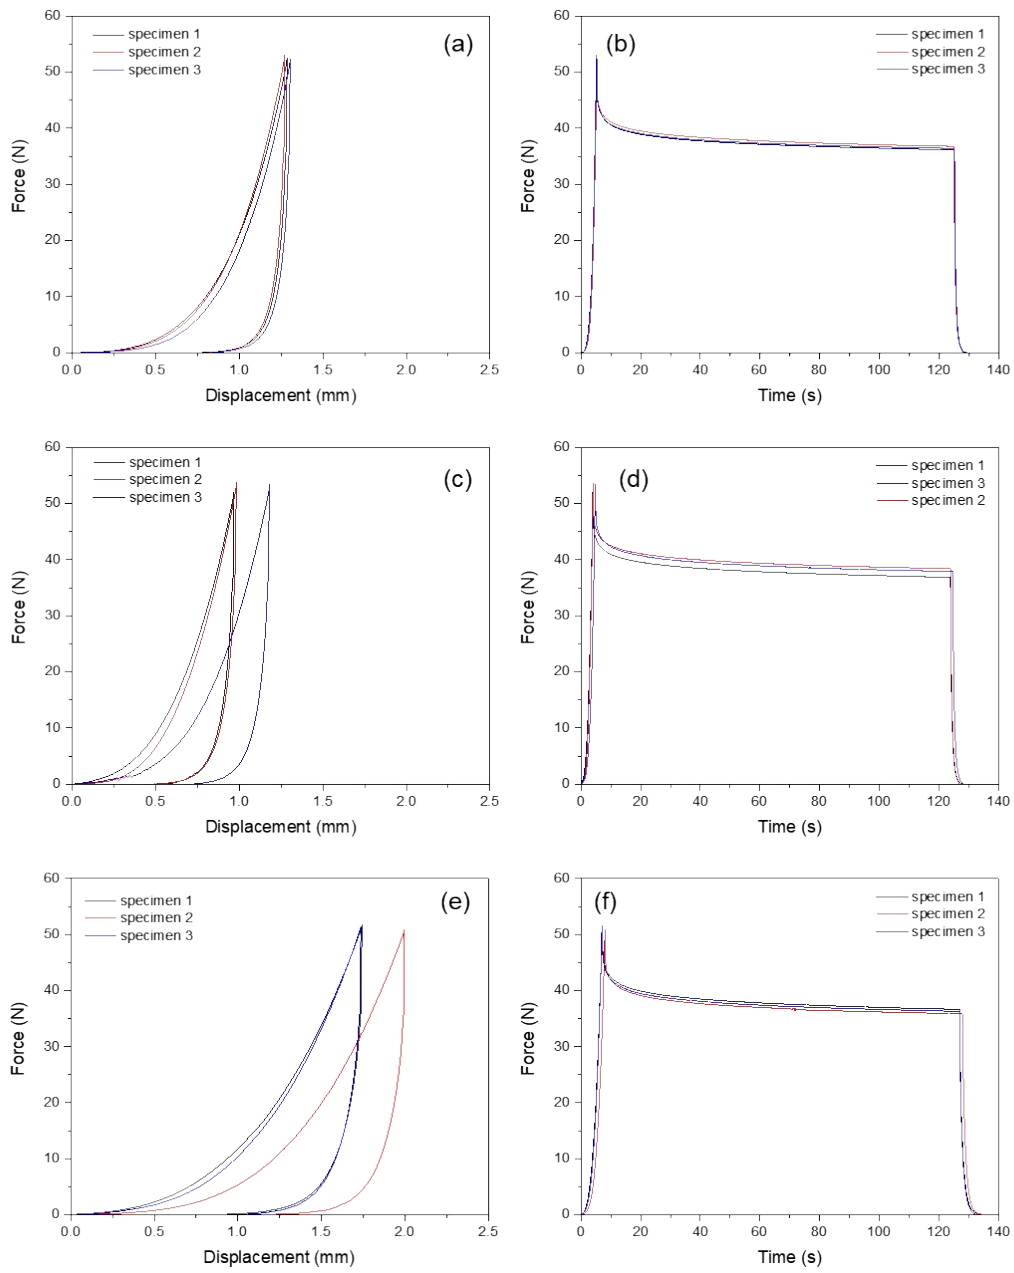

**Supplementary Figure S22.** Raw data from compression and relaxation tests of (a,b) ST/RT, (c, d) ST/50C, and (e, f) ST/85C dried MICROSCAFS®.

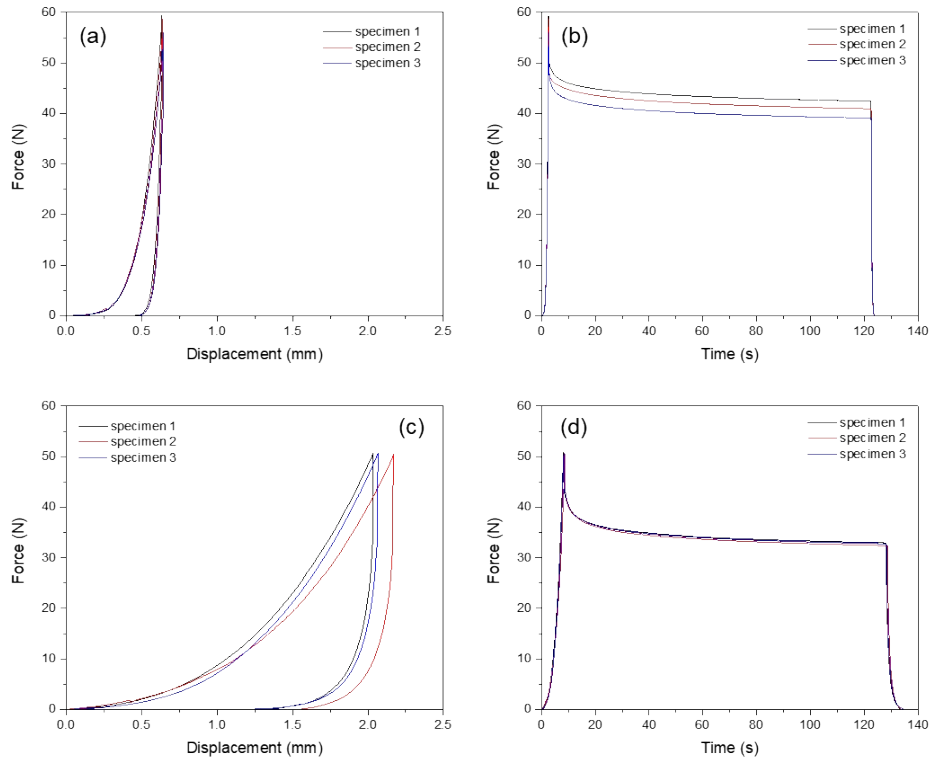

**Supplementary Figure S23.** Raw data from compression and relaxation tests of (a, b) ST/50C/GPTMS-, (c, d) ST/50C/GPTMS+ dried MICROSCAFS®.

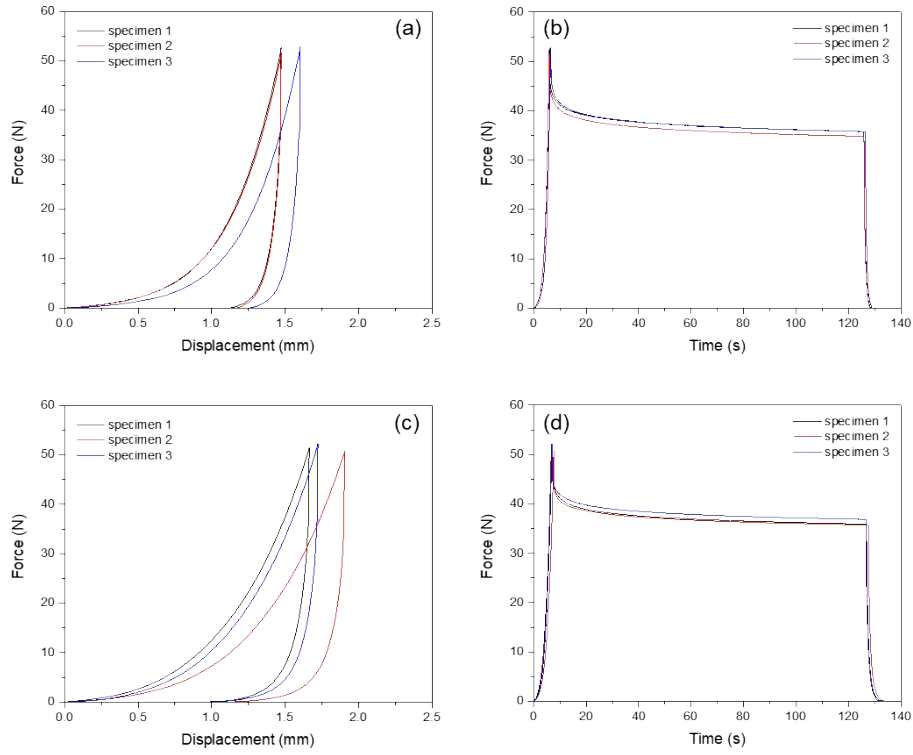

**Supplementary Figure S24.** Raw data from compression and relaxation tests of (a,b) ST/50C/AA+, (c, d) ST/50C/W+ dried MICROSCAFS®.

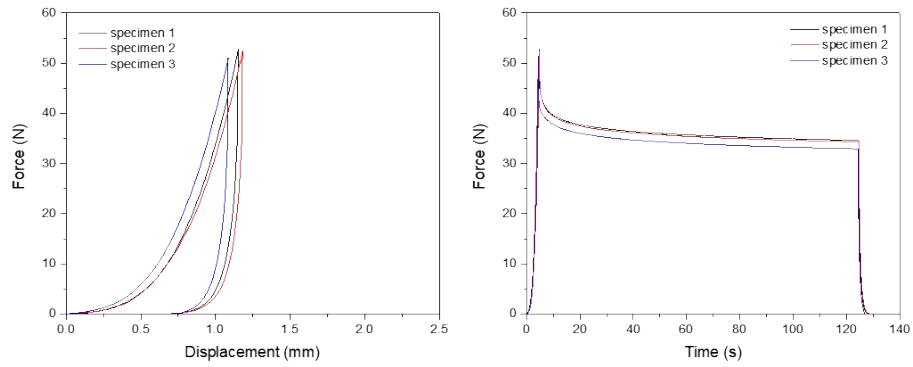

**Supplementary Figure S25.** Raw data from compression and relaxation tests of STH/50C/GPTMS+ dried MICROSCAFS®.
